# Supplementary material for: Hyperbranched fluorene-alt-carbazole copolymers with spiro[3.3]heptane-2,6-dispirofluorene as the core and their application in white polymer light-emitting devices
Source: Royal Society of Chemistry journal article supplement (doi:10.1039/c5ra05713b), 2015-01-01
Supplement: c5ra05713b1.pdf [file c5ra05713b1.pdf]

## Supplementary Information

### **Hyperbranched fluorene-alt-carbazole copolymers with spiro[3.3]heptane-2,6-dispirofluorene as the core and their application in white polymer light-emitting devices**

Yuling Wu,<sup>ab</sup> Jie Li,<sup>ab</sup> Wenqing Liang,<sup>ab</sup> Junli Yang,<sup>ab</sup> Jing Sun,<sup>ab</sup> Hua Wang,<sup>ab</sup>  
Xuguang Liu,<sup>c</sup> Bingshe Xu,<sup>\*ab</sup> Wei Huang,<sup>d</sup>

<sup>a</sup> Key Laboratory of Interface Science and Engineering in Advanced Materials, Taiyuan University of Technology, Taiyuan, 030024, China.

<sup>b</sup> Research Center of Advanced Materials Science and Technology, Taiyuan University of Technology, Taiyuan, 030024, China.

<sup>c</sup> College of Chemistry and Chemical Engineering, Taiyuan University of Technology, Taiyuan, 030024, China.

<sup>d</sup> Key Laboratory for Organic Electronics & Information Displays (KLOEID) and Institute of Advanced Materials, Nanjing University of Posts and Telecommunications (NUPT), Nanjing, 210046, China.

\* Corresponding author. E-mail: Bingshe Xu: [xubs@tyut.edu.cn](mailto:xubs@tyut.edu.cn)

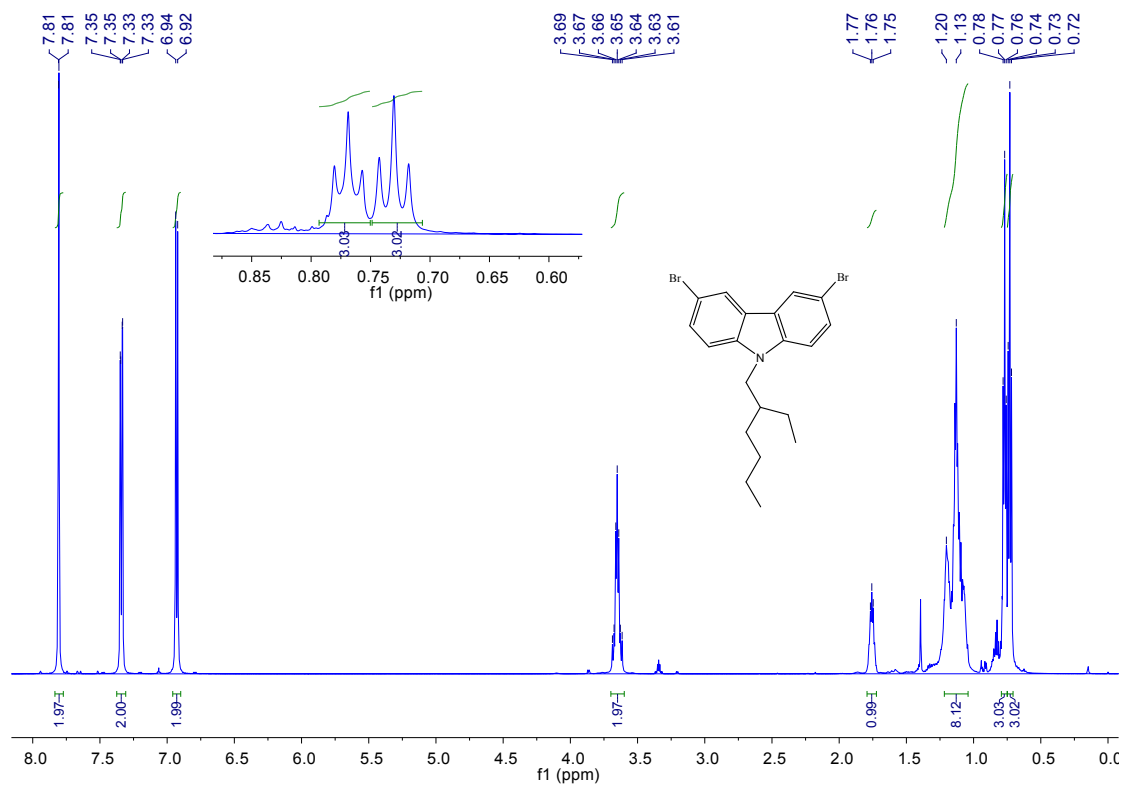

Figure S1.  $^1\text{H}$  NMR spectrum of DBrCz.

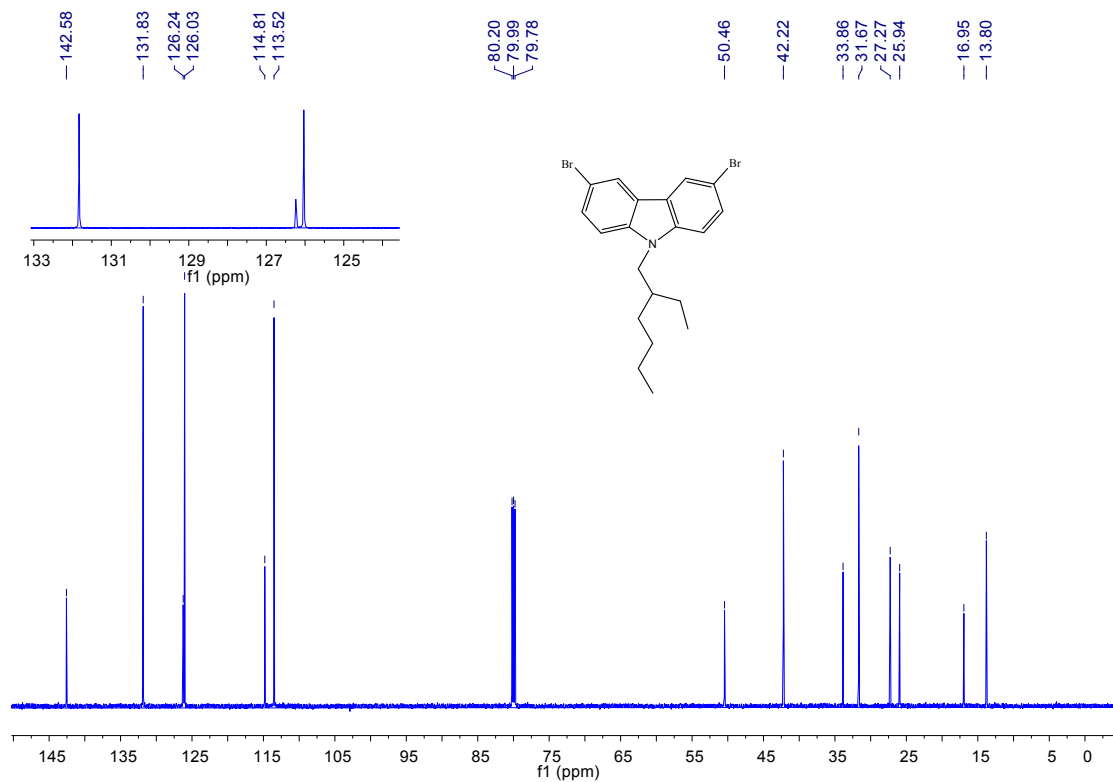

Figure S2.  $^{13}\text{C}$  NMR spectrum of DBrCz.

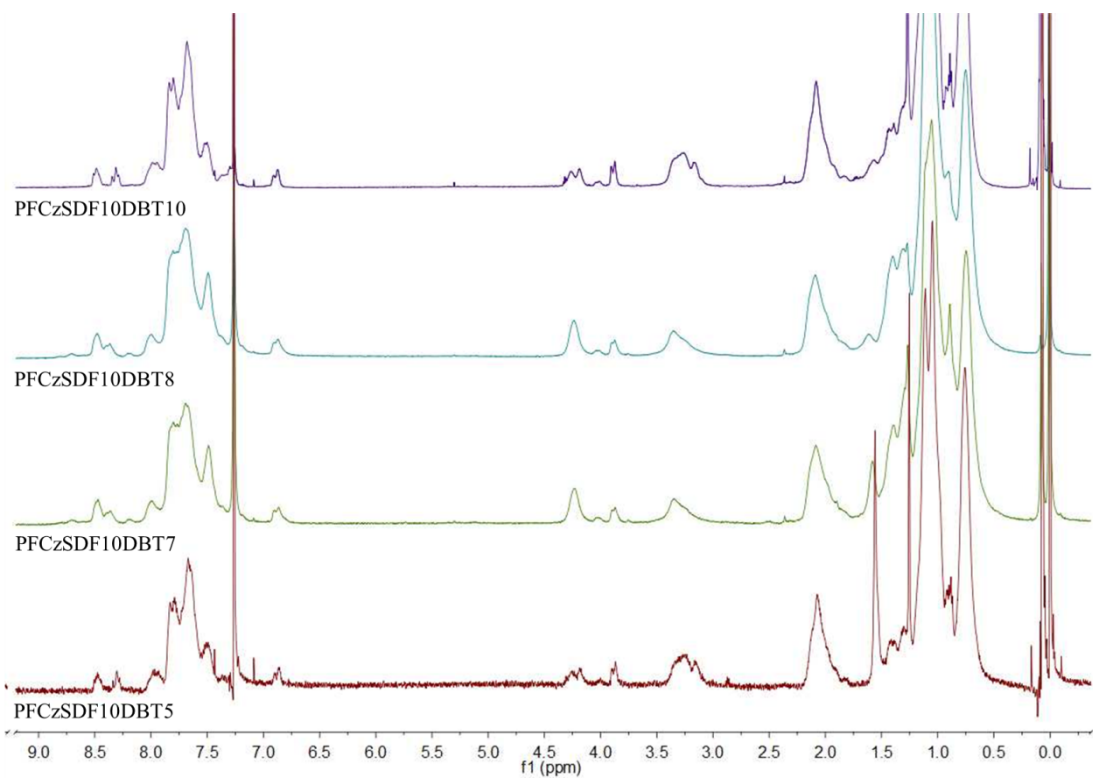

Figure S3.  $^1\text{H}$  NMR spectra of the copolymers.

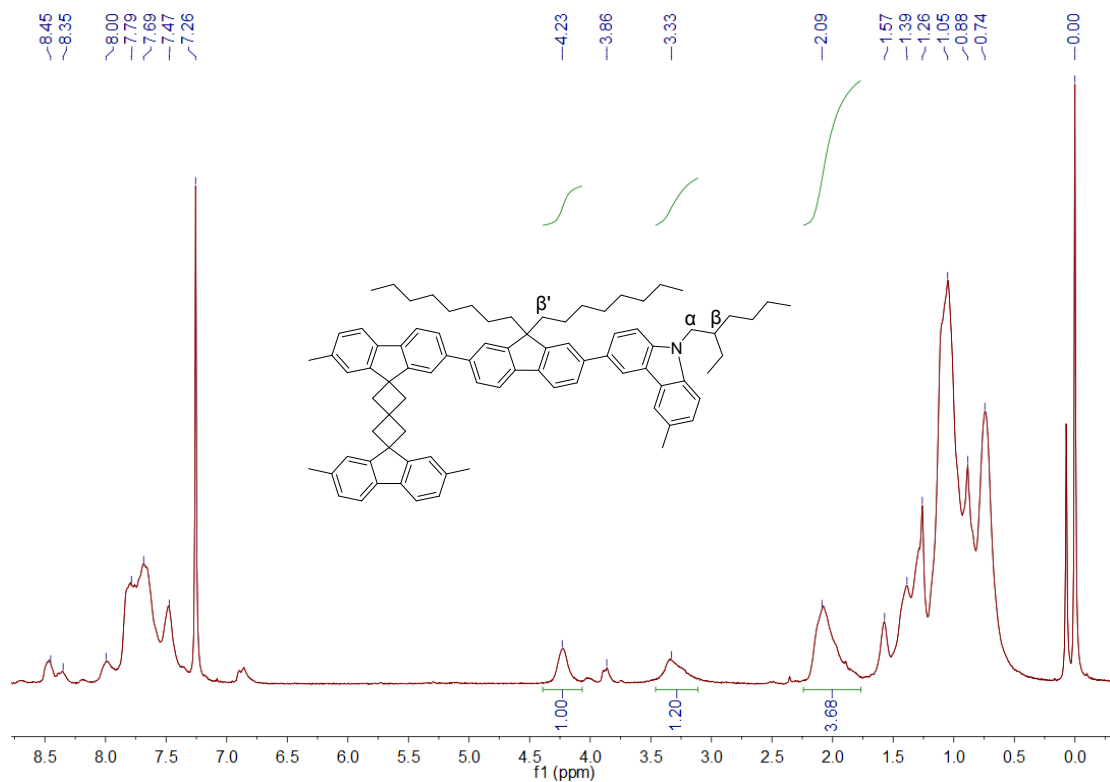

Figure S4.  $^1\text{H}$  NMR spectrum of PFCzSDF10DBT7.

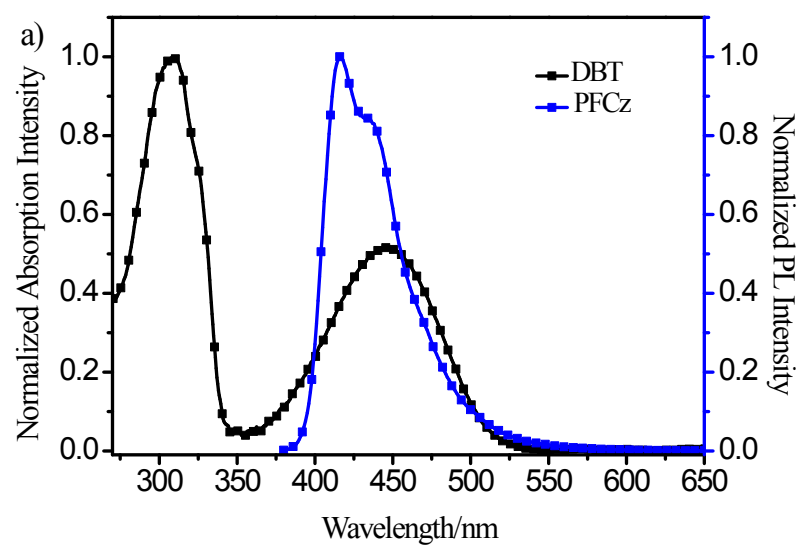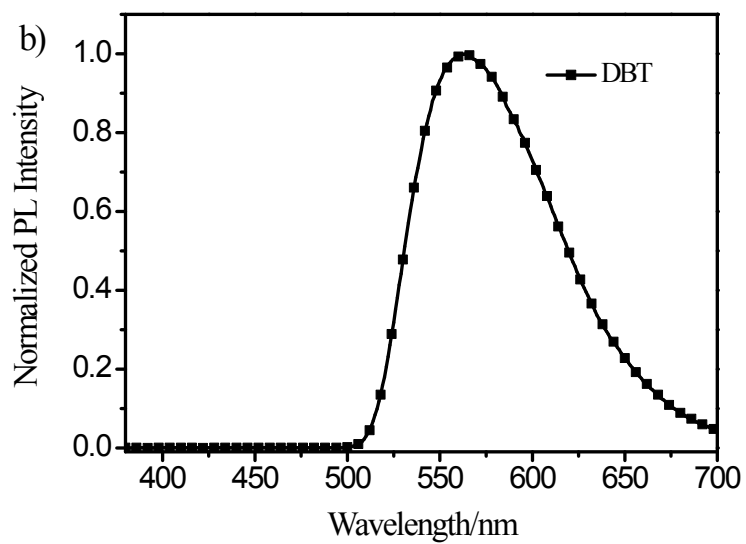

Figure S5. UV-vis absorption of DBT and PL spectra of **PFCz** in  $\text{CHCl}_3$  solution ( $10^{-5}$  mol/L) (a), and PL spectra of **DBT** in  $\text{CHCl}_3$  solution ( $10^{-5}$  mol/L) (b).
